# Supplementary material for: EGR1 is a gatekeeper of inflammatory enhancers in human macrophages
Source: PubMed Central journal article supplement — Sci Adv. 2021 Jan 13;7(3):eaaz8836. doi: 10.1126/sciadv.aaz8836 (PMC7806227; doi:10.1126/sciadv.aaz8836), 2021-01-13
Supplement: aaz8836_Supplementary_File_S1.pdf [file aaz8836_Supplementary_File_S1.pdf]

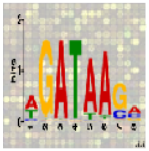

# MEME-ChIP

Motif Analysis of Large Nucleotide Datasets

For further information on how to interpret these results please access <http://meme-suite.org/doc/meme-chip-output-format.html>.

To get a copy of the MEME software please access <http://meme-suite.org>.

If you use MEME-ChIP in your research, please cite the following paper:

Philip Machanick and Timothy L. Bailey, "MEME-ChIP: motif analysis of large DNA datasets", *Bioinformatics*, 2712, 1696-1697, 2011. [[full text](#)]

[MOTIFS](#) | [PROGRAMS](#) | [INPUT FILES](#) | [PROGRAM INFORMATION](#) | [SUMMARY IN TSV FORMAT](#)  | [MOTIFS IN MEME TEXT FORMAT](#) 

## DESCRIPTION

ATAC MACRO SPECIFIC

## MOTIFS

The significant motifs (E-value  $\leq 0.05$ ) found by the programs MEME, DREME and CentriMo; clustered by similarity and ordered by E-value.

Expand All Clusters

Collapse All Clusters

### Motif Found

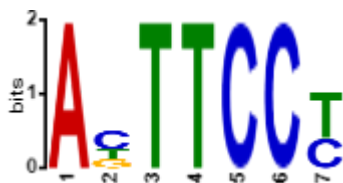

Discovery/  
Enrichment  
Program

[DREME](#)

E-  
value

7.3e-  
161

Known or  
Similar Motifs

[Sfpi1\\_primary  
\(UP00085\\_1\)](#)  
[SPIC\\_full](#)  
[SPIC  
\(MA0687.1\)](#)

Distribution

Not Centrally  
Enriched

SpaMo & FIMO

- [Motif Spacing Analysis](#)
- [Motif Sites in GFF3](#)

Reverse Complement  $\leftrightarrow$

Show 4 More  $\downarrow$

### Motif Found

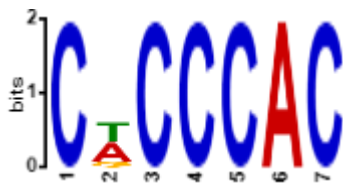

Discovery/  
Enrichment  
Program

[DREME](#)

E-  
value

3.8e-  
096

Known or  
Similar Motifs

[KLF9  
\(MA1107.1\)](#)  
[GLI2\\_DBD\\_1](#)

Distribution

Not Centrally  
Enriched

SpaMo & FIMO

- [Motif Spacing Analysis](#)
- [Motif Sites in GFF3](#)

Reverse Complement ⇌ Show 1 More ↓

| Motif Found                                                                                                          | Discovery/Enrichment Program | E-value  | Known or Similar Motifs                                                                                      | Distribution           | SpaMo & FIMO                                                                                                                          |
|----------------------------------------------------------------------------------------------------------------------|------------------------------|----------|--------------------------------------------------------------------------------------------------------------|------------------------|---------------------------------------------------------------------------------------------------------------------------------------|
|  <p>bits</p> <p>1 2 3 4 5 6 7 8</p> | DREME                        | 1.4e-063 | <a href="#">FOSL2 (MA0478.1)</a><br><a href="#">JUNB (MA0490.1)</a><br><a href="#">JUN(var.2) (MA0489.1)</a> | Not Centrally Enriched | <ul style="list-style-type: none"> <li><a href="#">Motif Spacing Analysis</a></li> <li><a href="#">Motif Sites in GFF3</a></li> </ul> |

Reverse Complement ⇌ Show 1 More ↓

| Motif Found                                                                                                                     | Discovery/Enrichment Program | E-value  | Known or Similar Motifs                                                                          | Distribution           | SpaMo & FIMO                                                                                                                          |
|---------------------------------------------------------------------------------------------------------------------------------|------------------------------|----------|--------------------------------------------------------------------------------------------------|------------------------|---------------------------------------------------------------------------------------------------------------------------------------|
|  <p>bits</p> <p>1 2 3 4 5 6 7 8 9 10 11 12</p> | MEME                         | 9.1e-049 | <a href="#">CTCF (MA0139.1)</a><br><a href="#">CTCF_full</a><br><a href="#">CTCFL (MA1102.1)</a> | Not Centrally Enriched | <ul style="list-style-type: none"> <li><a href="#">Motif Spacing Analysis</a></li> <li><a href="#">Motif Sites in GFF3</a></li> </ul> |

Reverse Complement ⇌ Show 4 More ↓

| Motif Found                                                                                                                       | Discovery/Enrichment Program | E-value  | Known or Similar Motifs                                                                                                      | Distribution           | SpaMo & FIMO                                                                                                                          |
|-----------------------------------------------------------------------------------------------------------------------------------|------------------------------|----------|------------------------------------------------------------------------------------------------------------------------------|------------------------|---------------------------------------------------------------------------------------------------------------------------------------|
| 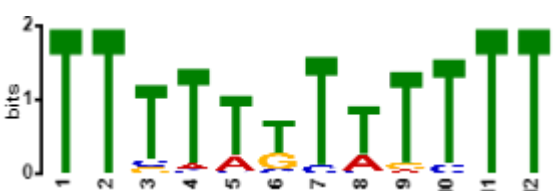 <p>bits</p> <p>1 2 3 4 5 6 7 8 9 10 11 12</p> | MEME                         | 6.8e-041 | <a href="#">ZNF384 (MA1125.1)</a><br><a href="#">Srf_secondary (UP00077_2)</a><br><a href="#">Mtf1_secondary (UP00097_2)</a> | Not Centrally Enriched | <ul style="list-style-type: none"> <li><a href="#">Motif Spacing Analysis</a></li> <li><a href="#">Motif Sites in GFF3</a></li> </ul> |

Reverse Complement ⇌ Show 1 More ↓

| Motif Found                                                                                                          | Discovery/Enrichment Program | E-value  | Known or Similar Motifs | Distribution           | SpaMo & FIMO                                                                                                                          |
|----------------------------------------------------------------------------------------------------------------------|------------------------------|----------|-------------------------|------------------------|---------------------------------------------------------------------------------------------------------------------------------------|
|  <p>bits</p> <p>1 2 3 4 5 6 7</p> | DREME                        | 2.8e-026 |                         | Not Centrally Enriched | <ul style="list-style-type: none"> <li><a href="#">Motif Spacing Analysis</a></li> <li><a href="#">Motif Sites in GFF3</a></li> </ul> |

Reverse Complement ⇌

| Motif Found | Discovery/Enrichment Program | E-value | Known or Similar Motifs | Distribution | SpaMo & FIMO |
|-------------|------------------------------|---------|-------------------------|--------------|--------------|
|             |                              |         |                         |              |              |

| Motif Found                                                                                                            | Discovery/Enrichment Program | E-value  | Known or Similar Motifs                                                                                                  | Distribution           | SpaMo & FIMO                                                                                                                          |
|------------------------------------------------------------------------------------------------------------------------|------------------------------|----------|--------------------------------------------------------------------------------------------------------------------------|------------------------|---------------------------------------------------------------------------------------------------------------------------------------|
|  <p>bits</p> <p>1 2 3 4 5</p>         | <a href="#">DREME</a>        | 3.4e-023 |                                                                                                                          | Not Centrally Enriched | <ul style="list-style-type: none"> <li><a href="#">Motif Spacing Analysis</a></li> <li><a href="#">Motif Sites in GFF3</a></li> </ul> |
| Reverse Complement ⇌                                                                                                   |                              |          |                                                                                                                          |                        |                                                                                                                                       |
|  <p>bits</p> <p>1 2 3 4 5</p>         | <a href="#">DREME</a>        | 1.4e-013 | <a href="#">JDP2_full_2</a><br><a href="#">JDP2(var.2)</a><br><a href="#">(MA0656.1)</a><br><a href="#">CREB3_full_1</a> | Not Centrally Enriched | <ul style="list-style-type: none"> <li><a href="#">Motif Spacing Analysis</a></li> <li><a href="#">Motif Sites in GFF3</a></li> </ul> |
| Reverse Complement ⇌                                                                                                   |                              |          |                                                                                                                          |                        |                                                                                                                                       |
|  <p>bits</p> <p>1 2 3 4 5 6</p>      | <a href="#">DREME</a>        | 1.3e-011 |                                                                                                                          | Not Centrally Enriched | <ul style="list-style-type: none"> <li><a href="#">Motif Spacing Analysis</a></li> <li><a href="#">Motif Sites in GFF3</a></li> </ul> |
| Reverse Complement ⇌                                                                                                   |                              |          |                                                                                                                          |                        |                                                                                                                                       |
|  <p>bits</p> <p>1 2 3 4 5 6</p>     | <a href="#">DREME</a>        | 5.0e-011 | <a href="#">MEF2A_DBD</a><br><a href="#">MEF2A</a><br><a href="#">(MA0052.3)</a><br><a href="#">MEF2D_DBD</a>            | Not Centrally Enriched | <ul style="list-style-type: none"> <li><a href="#">Motif Spacing Analysis</a></li> <li><a href="#">Motif Sites in GFF3</a></li> </ul> |
| Reverse Complement ⇌                                                                                                   |                              |          |                                                                                                                          |                        |                                                                                                                                       |
|  <p>bits</p> <p>1 2 3 4 5 6 7 8</p> | <a href="#">DREME</a>        | 2.2e-007 | <a href="#">SPIB</a><br><a href="#">(MA0081.1)</a>                                                                       | Not Centrally Enriched | <ul style="list-style-type: none"> <li><a href="#">Motif Spacing Analysis</a></li> <li><a href="#">Motif Sites in GFF3</a></li> </ul> |

## Reverse Complement ⇌

| Motif Found                                                                       | Discovery/<br>Enrichment<br>Program | E-<br>value | Known or<br>Similar Motifs      | Distribution           | SpaMo & FIMO                                                                                                                          |
|-----------------------------------------------------------------------------------|-------------------------------------|-------------|---------------------------------|------------------------|---------------------------------------------------------------------------------------------------------------------------------------|
|  | <a href="#">DREME</a>               | 1.7e-006    | <a href="#">Klf1 (MA0493.1)</a> | Not Centrally Enriched | <ul style="list-style-type: none"> <li><a href="#">Motif Spacing Analysis</a></li> <li><a href="#">Motif Sites in GFF3</a></li> </ul> |

## Reverse Complement ⇌

| Motif Found                                                                       | Discovery/<br>Enrichment<br>Program | E-<br>value | Known or<br>Similar<br>Motifs | Distribution           | SpaMo & FIMO                                                                                                                          |
|-----------------------------------------------------------------------------------|-------------------------------------|-------------|-------------------------------|------------------------|---------------------------------------------------------------------------------------------------------------------------------------|
|  | <a href="#">DREME</a>               | 3.2e-004    |                               | Not Centrally Enriched | <ul style="list-style-type: none"> <li><a href="#">Motif Spacing Analysis</a></li> <li><a href="#">Motif Sites in GFF3</a></li> </ul> |

## Reverse Complement ⇌

| Motif Found                                                                         | Discovery/<br>Enrichment<br>Program | E-<br>value | Known or<br>Similar Motifs              | Distribution           | SpaMo & FIMO                                                                                                                          |
|-------------------------------------------------------------------------------------|-------------------------------------|-------------|-----------------------------------------|------------------------|---------------------------------------------------------------------------------------------------------------------------------------|
|  | <a href="#">DREME</a>               | 2.4e-003    | <a href="#">Pou5f1::Sox2 (MA0142.1)</a> | Not Centrally Enriched | <ul style="list-style-type: none"> <li><a href="#">Motif Spacing Analysis</a></li> <li><a href="#">Motif Sites in GFF3</a></li> </ul> |

## Reverse Complement ⇌

## PROGRAMS

| Command                                                                                                 | Running Time | Status  | Outputs                                                                         |
|---------------------------------------------------------------------------------------------------------|--------------|---------|---------------------------------------------------------------------------------|
| <b>getsize</b><br>./TOP_5000_ATAC_MACRO_SPECIFIC_PEAKS.fasta<br>1> \$metrics                            | 0.04s        | Success |                                                                                 |
| <b>fasta-most</b> -min 50 <<br>./TOP_5000_ATAC_MACRO_SPECIFIC_PEAKS.fasta<br>1> \$metrics               | 0.11s        | Success |                                                                                 |
| <b>fasta-center</b> -dna -len 100 <<br>./TOP_5000_ATAC_MACRO_SPECIFIC_PEAKS.fasta<br>1> ./seqs-centered | 0.16s        | Success | <ul style="list-style-type: none"> <li><a href="#">seqs-centered</a></li> </ul> |

| Command                                                                                                                                                                                                                                                                                                                                            | Running Time  | Status                   | Outputs                                                                                       |
|----------------------------------------------------------------------------------------------------------------------------------------------------------------------------------------------------------------------------------------------------------------------------------------------------------------------------------------------------|---------------|--------------------------|-----------------------------------------------------------------------------------------------|
| <b>fasta-shuffle-letters</b> ./seqs-centered<br>./seqs-shuffled -kmer 2 -tag -dinuc -dna -<br>seed 1                                                                                                                                                                                                                                               | 0.05s         | Success                  | • <a href="#">seqs-shuffled</a>                                                               |
| <b>fasta-get-markov</b> -nostatus -nosummary -<br>dna -m 1<br>./TOP_5000_ATAC_MACRO_SPECIFIC_PEAKS.fasta<br>./background                                                                                                                                                                                                                           | 0.03s         | Success                  | • <a href="#">Background</a>                                                                  |
| <b>meme</b> ./seqs-centered -oc meme_out -mod<br>zoops -nmotifs 10 -minw 6 -maxw 12 -bfile<br>./background -dna -searchsize 100000 -time<br>5082 -revcomp -nostatus                                                                                                                                                                                | 1h 15m 38.54s | Success                  | • <a href="#">MEME HTML</a><br>• <a href="#">MEME text</a><br>• <a href="#">MEME XML</a>      |
| <b>dreme</b> -verbosity 1 -oc dreme_out -png -<br>dna -p ./seqs-centered -n ./seqs-shuffled -t<br>5324 -e 0.05                                                                                                                                                                                                                                     | 13m 41.22s    | Success                  | • <a href="#">DREME HTML</a><br>• <a href="#">DREME text</a><br>• <a href="#">DREME XML</a>   |
| <b>centrimo</b> -seqlen 220 -verbosity 1 -oc<br>centrimo_out -bfile ./background -score 5.0<br>-ethresh 10.0<br>./TOP_5000_ATAC_MACRO_SPECIFIC_PEAKS.fasta<br>meme_out/meme.xml<br>dreme_out/dreme.xml<br>db/EUKARYOTE/jolma2013.meme<br>db/JASPAR/JASPAR2018_CORE_vertibrates_non-<br>redundant.meme<br>db/MOUSE/uniprobe_mouse.meme              | 5.95s         | <a href="#">Warnings</a> | • <a href="#">CentriMo HTML</a><br>• <a href="#">Site Counts</a>                              |
| <b>tomtom</b> -verbosity 1 -oc<br>meme_tomtom_out -min-overlap 5 -dist<br>pearson -evaluate -thresh 1 -no-ssc<br>meme_out/meme.xml<br>db/EUKARYOTE/jolma2013.meme<br>db/JASPAR/JASPAR2018_CORE_vertibrates_non-<br>redundant.meme<br>db/MOUSE/uniprobe_mouse.meme                                                                                  | 21.15s        | Success                  | • <a href="#">Tomtom HTML</a><br>• <a href="#">Tomtom TSV</a><br>• <a href="#">Tomtom XML</a> |
| <b>tomtom</b> -verbosity 1 -oc<br>dreme_tomtom_out -min-overlap 5 -dist<br>pearson -evaluate -thresh 1 -no-ssc<br>dreme_out/dreme.xml<br>db/EUKARYOTE/jolma2013.meme<br>db/JASPAR/JASPAR2018_CORE_vertibrates_non-<br>redundant.meme<br>db/MOUSE/uniprobe_mouse.meme                                                                               | 14.45s        | Success                  | • <a href="#">Tomtom HTML</a><br>• <a href="#">Tomtom TSV</a><br>• <a href="#">Tomtom XML</a> |
| <b>tomtom</b> -verbosity 1 -text -thresh 0.1<br>./combined.meme ./combined.meme 1><br>./motif_alignment.txt                                                                                                                                                                                                                                        | 0.24s         | Success                  | • <a href="#">Motif Alignment</a>                                                             |
| <b>spamo</b> -verbosity 1 -oc spamo_out_1 -bgfile<br>./background -keepprimary -primary<br>ABTTCCY<br>./TOP_5000_ATAC_MACRO_SPECIFIC_PEAKS.fasta<br>dreme_out/dreme.xml<br>meme_out/meme.xml<br>dreme_out/dreme.xml<br>db/EUKARYOTE/jolma2013.meme<br>db/JASPAR/JASPAR2018_CORE_vertibrates_non-<br>redundant.meme<br>db/MOUSE/uniprobe_mouse.meme | 58.19s        | <a href="#">Warnings</a> | • <a href="#">SpaMo HTML</a>                                                                  |

| Command                                                                                                                                                                                                                                                                                                                                                 | Running Time | Status                   | Outputs                      |
|---------------------------------------------------------------------------------------------------------------------------------------------------------------------------------------------------------------------------------------------------------------------------------------------------------------------------------------------------------|--------------|--------------------------|------------------------------|
| <b>spamo</b> -verbosity 1 -oc spamo_out_2 -bgfile<br>./background -keepprimary -primary<br>CDCCCAC<br>./TOP_5000_ATAC_MACRO_SPECIFIC_PEAKS.fasta<br>dreame_out/dreame.xml<br>meme_out/meme.xml<br>dreame_out/dreame.xml<br>db/EUKARYOTE/jolma2013.meme<br>db/JASPAR/JASPAR2018_CORE_vertibrates_non-<br>redundant.meme<br>db/MOUSE/uniprobe_mouse.meme  | 38.20s       | <a href="#">Warnings</a> | • <a href="#">SpaMo HTML</a> |
| <b>spamo</b> -verbosity 1 -oc spamo_out_3 -bgfile<br>./background -keepprimary -primary<br>RTGABTCA<br>./TOP_5000_ATAC_MACRO_SPECIFIC_PEAKS.fasta<br>dreame_out/dreame.xml<br>meme_out/meme.xml<br>dreame_out/dreame.xml<br>db/EUKARYOTE/jolma2013.meme<br>db/JASPAR/JASPAR2018_CORE_vertibrates_non-<br>redundant.meme<br>db/MOUSE/uniprobe_mouse.meme | 22.63s       | <a href="#">Warnings</a> | • <a href="#">SpaMo HTML</a> |
| <b>spamo</b> -verbosity 1 -oc spamo_out_4 -bgfile<br>./background -keepprimary -primary<br>YGCCMYCTRSTG<br>./TOP_5000_ATAC_MACRO_SPECIFIC_PEAKS.fasta<br>meme_out/meme.xml meme_out/meme.xml<br>dreame_out/dreame.xml<br>db/EUKARYOTE/jolma2013.meme<br>db/JASPAR/JASPAR2018_CORE_vertibrates_non-<br>redundant.meme<br>db/MOUSE/uniprobe_mouse.meme    | 27.38s       | <a href="#">Warnings</a> | • <a href="#">SpaMo HTML</a> |
| <b>spamo</b> -verbosity 1 -oc spamo_out_5 -bgfile<br>./background -keepprimary -primary<br>TTTTTTTTTTTT<br>./TOP_5000_ATAC_MACRO_SPECIFIC_PEAKS.fasta<br>meme_out/meme.xml meme_out/meme.xml<br>dreame_out/dreame.xml<br>db/EUKARYOTE/jolma2013.meme<br>db/JASPAR/JASPAR2018_CORE_vertibrates_non-<br>redundant.meme<br>db/MOUSE/uniprobe_mouse.meme    | 18.05s       | <a href="#">Warnings</a> | • <a href="#">SpaMo HTML</a> |
| <b>spamo</b> -verbosity 1 -oc spamo_out_6 -bgfile<br>./background -keepprimary -primary<br>BCACRTG<br>./TOP_5000_ATAC_MACRO_SPECIFIC_PEAKS.fasta<br>dreame_out/dreame.xml<br>meme_out/meme.xml<br>dreame_out/dreame.xml<br>db/EUKARYOTE/jolma2013.meme<br>db/JASPAR/JASPAR2018_CORE_vertibrates_non-<br>redundant.meme<br>db/MOUSE/uniprobe_mouse.meme  | 26.32s       | <a href="#">Warnings</a> | • <a href="#">SpaMo HTML</a> |

| Command                                                                                                                                                                                                                                                                                                                                                   | Running Time | Status                   | Outputs                      |
|-----------------------------------------------------------------------------------------------------------------------------------------------------------------------------------------------------------------------------------------------------------------------------------------------------------------------------------------------------------|--------------|--------------------------|------------------------------|
| <b>spamo</b> -verbosity 1 -oc spamo_out_7 -bgfile<br>./background -keepprimary -primary GWAAY<br>./TOP_5000_ATAC_MACRO_SPECIFIC_PEAKS.fasta<br>dreame_out/dreame.xml<br>meme_out/meme.xml<br>dreame_out/dreame.xml<br>db/EUKARYOTE/jolma2013.meme<br>db/JASPAR/JASPAR2018_CORE_vertibrates_non-<br>redundant.meme<br>db/MOUSE/uniprobe_mouse.meme         | 1m 29.44s    | <a href="#">Warnings</a> | • <a href="#">SpaMo HTML</a> |
| <b>spamo</b> -verbosity 1 -oc spamo_out_8 -bgfile<br>./background -keepprimary -primary GTCAAY<br>./TOP_5000_ATAC_MACRO_SPECIFIC_PEAKS.fasta<br>dreame_out/dreame.xml<br>meme_out/meme.xml<br>dreame_out/dreame.xml<br>db/EUKARYOTE/jolma2013.meme<br>db/JASPAR/JASPAR2018_CORE_vertibrates_non-<br>redundant.meme<br>db/MOUSE/uniprobe_mouse.meme        | 1m 10.94s    | <a href="#">Warnings</a> | • <a href="#">SpaMo HTML</a> |
| <b>spamo</b> -verbosity 1 -oc spamo_out_9 -bgfile<br>./background -keepprimary -primary<br>AGGCKG<br>./TOP_5000_ATAC_MACRO_SPECIFIC_PEAKS.fasta<br>dreame_out/dreame.xml<br>meme_out/meme.xml<br>dreame_out/dreame.xml<br>db/EUKARYOTE/jolma2013.meme<br>db/JASPAR/JASPAR2018_CORE_vertibrates_non-<br>redundant.meme<br>db/MOUSE/uniprobe_mouse.meme     | 35.23s       | <a href="#">Warnings</a> | • <a href="#">SpaMo HTML</a> |
| <b>spamo</b> -verbosity 1 -oc spamo_out_10 -<br>bgfile ./background -keepprimary -primary<br>TATWTW<br>./TOP_5000_ATAC_MACRO_SPECIFIC_PEAKS.fasta<br>dreame_out/dreame.xml<br>meme_out/meme.xml<br>dreame_out/dreame.xml<br>db/EUKARYOTE/jolma2013.meme<br>db/JASPAR/JASPAR2018_CORE_vertibrates_non-<br>redundant.meme<br>db/MOUSE/uniprobe_mouse.meme   | 28.07s       | <a href="#">Warnings</a> | • <a href="#">SpaMo HTML</a> |
| <b>spamo</b> -verbosity 1 -oc spamo_out_11 -<br>bgfile ./background -keepprimary -primary<br>DGAGGAAC<br>./TOP_5000_ATAC_MACRO_SPECIFIC_PEAKS.fasta<br>dreame_out/dreame.xml<br>meme_out/meme.xml<br>dreame_out/dreame.xml<br>db/EUKARYOTE/jolma2013.meme<br>db/JASPAR/JASPAR2018_CORE_vertibrates_non-<br>redundant.meme<br>db/MOUSE/uniprobe_mouse.meme | 13.45s       | <a href="#">Warnings</a> | • <a href="#">SpaMo HTML</a> |

| Command                                                                                                                                                                                                                                                                                                                   | Running Time | Status                   | Outputs                                                                                 |
|---------------------------------------------------------------------------------------------------------------------------------------------------------------------------------------------------------------------------------------------------------------------------------------------------------------------------|--------------|--------------------------|-----------------------------------------------------------------------------------------|
| <b>spamo</b> -verbosity 1 -oc spamo_out_12 -bgfile ./background -keepprimary -primary CCACR ./TOP_5000_ATAC_MACRO_SPECIFIC_PEAKS.fasta dreame_out/dreame.xml meme_out/meme.xml dreame_out/dreame.xml db/EUKARYOTE/jolma2013.meme db/JASPAR/JASPAR2018_CORE_vertibrates_non-redundant.meme db/MOUSE/uniprobe_mouse.meme    | 1m 13.35s    | <a href="#">Warnings</a> | • <a href="#">SpaMo HTML</a>                                                            |
| <b>spamo</b> -verbosity 1 -oc spamo_out_13 -bgfile ./background -keepprimary -primary GCAGAAGY ./TOP_5000_ATAC_MACRO_SPECIFIC_PEAKS.fasta dreame_out/dreame.xml meme_out/meme.xml dreame_out/dreame.xml db/EUKARYOTE/jolma2013.meme db/JASPAR/JASPAR2018_CORE_vertibrates_non-redundant.meme db/MOUSE/uniprobe_mouse.meme | 12.10s       | <a href="#">Warnings</a> | • <a href="#">SpaMo HTML</a>                                                            |
| <b>spamo</b> -verbosity 1 -oc spamo_out_14 -bgfile ./background -keepprimary -primary TTADGCAA ./TOP_5000_ATAC_MACRO_SPECIFIC_PEAKS.fasta dreame_out/dreame.xml meme_out/meme.xml dreame_out/dreame.xml db/EUKARYOTE/jolma2013.meme db/JASPAR/JASPAR2018_CORE_vertibrates_non-redundant.meme db/MOUSE/uniprobe_mouse.meme | 11.01s       | <a href="#">Warnings</a> | • <a href="#">SpaMo HTML</a>                                                            |
| <b>fimo</b> --parse-genomic-coord --verbosity 1 --oc fimo_out_1 --bgfile ./background --motif ABTTCCY dreame_out/dreame.xml ./TOP_5000_ATAC_MACRO_SPECIFIC_PEAKS.fasta                                                                                                                                                    | 0.91s        | Success                  | • <a href="#">FIMO GFF</a><br>• <a href="#">FIMO HTML</a><br>• <a href="#">FIMO TSV</a> |
| <b>fimo</b> --parse-genomic-coord --verbosity 1 --oc fimo_out_2 --bgfile ./background --motif CDCCCAC dreame_out/dreame.xml ./TOP_5000_ATAC_MACRO_SPECIFIC_PEAKS.fasta                                                                                                                                                    | 0.98s        | Success                  | • <a href="#">FIMO GFF</a><br>• <a href="#">FIMO HTML</a><br>• <a href="#">FIMO TSV</a> |
| <b>fimo</b> --parse-genomic-coord --verbosity 1 --oc fimo_out_3 --bgfile ./background --motif RTGABTCA dreame_out/dreame.xml ./TOP_5000_ATAC_MACRO_SPECIFIC_PEAKS.fasta                                                                                                                                                   | 0.91s        | Success                  | • <a href="#">FIMO GFF</a><br>• <a href="#">FIMO HTML</a><br>• <a href="#">FIMO TSV</a> |
| <b>fimo</b> --parse-genomic-coord --verbosity 1 --oc fimo_out_4 --bgfile ./background --motif YGCCMYCTRSTG meme_out/meme.xml ./TOP_5000_ATAC_MACRO_SPECIFIC_PEAKS.fasta                                                                                                                                                   | 0.91s        | Success                  | • <a href="#">FIMO GFF</a><br>• <a href="#">FIMO HTML</a><br>• <a href="#">FIMO TSV</a> |
| <b>fimo</b> --parse-genomic-coord --verbosity 1 --oc fimo_out_5 --bgfile ./background --motif TTTTTTTTTTTT meme_out/meme.xml ./TOP_5000_ATAC_MACRO_SPECIFIC_PEAKS.fasta                                                                                                                                                   | 0.94s        | Success                  | • <a href="#">FIMO GFF</a><br>• <a href="#">FIMO HTML</a><br>• <a href="#">FIMO TSV</a> |



| Command                                                                                                                                                                | Running Time | Status  | Outputs                                                                                                                                         |
|------------------------------------------------------------------------------------------------------------------------------------------------------------------------|--------------|---------|-------------------------------------------------------------------------------------------------------------------------------------------------|
| <b>fimo</b> --parse-genomic-coord --verbosity 1 --oc fimo_out_6 --bgfile ./background --motif BCACRTG dreme_out/dreme.xml ./TOP_5000_ATAC_MACRO_SPECIFIC_PEAKS.fasta   | 0.90s        | Success | <ul style="list-style-type: none"> <li><a href="#">FIMO GFF</a></li> <li><a href="#">FIMO HTML</a></li> <li><a href="#">FIMO TSV</a></li> </ul> |
| <b>fimo</b> --parse-genomic-coord --verbosity 1 --oc fimo_out_7 --bgfile ./background --motif GWAAY dreme_out/dreme.xml ./TOP_5000_ATAC_MACRO_SPECIFIC_PEAKS.fasta     | 1.16s        | Success | <ul style="list-style-type: none"> <li><a href="#">FIMO GFF</a></li> <li><a href="#">FIMO HTML</a></li> <li><a href="#">FIMO TSV</a></li> </ul> |
| <b>fimo</b> --parse-genomic-coord --verbosity 1 --oc fimo_out_8 --bgfile ./background --motif GTCAY dreme_out/dreme.xml ./TOP_5000_ATAC_MACRO_SPECIFIC_PEAKS.fasta     | 0.86s        | Success | <ul style="list-style-type: none"> <li><a href="#">FIMO GFF</a></li> <li><a href="#">FIMO HTML</a></li> <li><a href="#">FIMO TSV</a></li> </ul> |
| <b>fimo</b> --parse-genomic-coord --verbosity 1 --oc fimo_out_9 --bgfile ./background --motif AGGCKG dreme_out/dreme.xml ./TOP_5000_ATAC_MACRO_SPECIFIC_PEAKS.fasta    | 0.86s        | Success | <ul style="list-style-type: none"> <li><a href="#">FIMO GFF</a></li> <li><a href="#">FIMO HTML</a></li> <li><a href="#">FIMO TSV</a></li> </ul> |
| <b>fimo</b> --parse-genomic-coord --verbosity 1 --oc fimo_out_10 --bgfile ./background --motif TATWTW dreme_out/dreme.xml ./TOP_5000_ATAC_MACRO_SPECIFIC_PEAKS.fasta   | 0.83s        | Success | <ul style="list-style-type: none"> <li><a href="#">FIMO GFF</a></li> <li><a href="#">FIMO HTML</a></li> <li><a href="#">FIMO TSV</a></li> </ul> |
| <b>fimo</b> --parse-genomic-coord --verbosity 1 --oc fimo_out_11 --bgfile ./background --motif DGAGGAAC dreme_out/dreme.xml ./TOP_5000_ATAC_MACRO_SPECIFIC_PEAKS.fasta | 0.89s        | Success | <ul style="list-style-type: none"> <li><a href="#">FIMO GFF</a></li> <li><a href="#">FIMO HTML</a></li> <li><a href="#">FIMO TSV</a></li> </ul> |
| <b>fimo</b> --parse-genomic-coord --verbosity 1 --oc fimo_out_12 --bgfile ./background --motif CCACR dreme_out/dreme.xml ./TOP_5000_ATAC_MACRO_SPECIFIC_PEAKS.fasta    | 1.29s        | Success | <ul style="list-style-type: none"> <li><a href="#">FIMO GFF</a></li> <li><a href="#">FIMO HTML</a></li> <li><a href="#">FIMO TSV</a></li> </ul> |
| <b>fimo</b> --parse-genomic-coord --verbosity 1 --oc fimo_out_13 --bgfile ./background --motif GCAGAAGY dreme_out/dreme.xml ./TOP_5000_ATAC_MACRO_SPECIFIC_PEAKS.fasta | 0.91s        | Success | <ul style="list-style-type: none"> <li><a href="#">FIMO GFF</a></li> <li><a href="#">FIMO HTML</a></li> <li><a href="#">FIMO TSV</a></li> </ul> |
| <b>fimo</b> --parse-genomic-coord --verbosity 1 --oc fimo_out_14 --bgfile ./background --motif TTADGCAA dreme_out/dreme.xml ./TOP_5000_ATAC_MACRO_SPECIFIC_PEAKS.fasta | 0.90s        | Success | <ul style="list-style-type: none"> <li><a href="#">FIMO GFF</a></li> <li><a href="#">FIMO HTML</a></li> <li><a href="#">FIMO TSV</a></li> </ul> |

## INPUT FILES

### Alphabet

**Background source:** built from the (primary) sequences

| Name     | Bg.    |   |   |   | Bg.    | Name    |
|----------|--------|---|---|---|--------|---------|
| Adenine  | 0.2624 | A | ~ | T | 0.2624 | Thymine |
| Cytosine | 0.2376 | C | ~ | G | 0.2376 | Guanine |

### Primary Sequences

| Database                                           | Source                                   | Sequence Count |
|----------------------------------------------------|------------------------------------------|----------------|
| <a href="#">TOP 5000 ATAC MACRO SPECIFIC PEAKS</a> | TOP_5000_ATAC_MACRO_SPECIFIC_PEAKS.fasta | 5000           |

## Motifs

| Database                                  | Source                                                   | Motif Count |
|-------------------------------------------|----------------------------------------------------------|-------------|
| jolma2013                                 | db/EUKARYOTE/jolma2013.meme                              | 843         |
| JASPAR2018 CORE vertebrates non-redundant | db/JASPAR/JASPAR2018_CORE Vertebrates non-redundant.meme | 579         |
| uniprobe mouse                            | db/MOUSE/uniprobe_mouse.meme                             | 386         |

### MEME-ChIP version

5.1.1 (Release date: Wed Jan 29 15:00:42 2020 -0800)

### Reference

Philip Machanick and Timothy L. Bailey, "MEME-ChIP: motif analysis of large DNA datasets", *Bioinformatics*, 2712, 1696-1697, 2011.

### Command line summary

```
meme-chip -oc . -time 300 -ccut 100 -fdesc description -order 1 -db db/EUKARYOTE/jolma2013.meme -db db/JASPAR/JASPAR2018_CORE Vertebrates non-redundant.meme -db db/MOUSE/uniprobe_mouse.meme -meme-mod zoops -meme-minw 6 -meme-maxw 12 -meme-nmotifs 10 -meme-searchsize 100000 -dreme-e 0.05 -centrimo-score 5.0 -centrimo-ethresh 10.0 TOP_5000_ATAC_MACRO_SPECIFIC_PEAKS.fasta
```



# Tomtom analysis

We subjected the CT/ACCCAC motif identified in our analysis to the Tomtom algorithm, which identifies the most closely related motifs in the JASPAR, jolma2013 and uniprobe\_mouse databases.

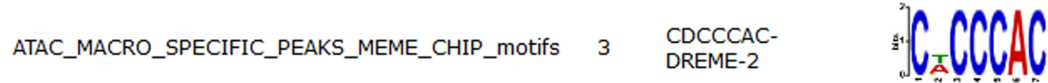

## Matching motifs:

[MA1107.1 \(KLF9\)](#), [GLI2\\_DBD\\_1](#), [EGR2\\_DBD](#), [MA0472.2 \(EGR2\)](#), [SP1\\_DBD](#), [EGR2\\_full](#), [SP3\\_DBD](#), [MA0746.1 \(SP3\)](#), [ZNF143\\_DBD](#), [MA0088.2 \(ZNF143\)](#), [EGR1\\_full](#), [MA0162.3 \(EGR1\)](#), [Egr3\\_DBD](#), [EGR1\\_DBD](#), [EGR3\\_DBD](#), [MA0732.1 \(EGR3\)](#), [EGR4\\_DBD\\_1](#), [EGR4\\_DBD\\_2](#),

Tabular format of MEME-CHIP motif analysis for macrophage-specific accessible sites

| MOTIF_INDEX | MOTIF_SOURCE | CONSENSUS    | WIDTH | SITES | E-VALUE   | E-VALUE_S | MOST_SIMILAR_MOTIF_SOURCE                                | MOST_SIMILAR_MOTIF        |
|-------------|--------------|--------------|-------|-------|-----------|-----------|----------------------------------------------------------|---------------------------|
| 1           | DREME        | ABTTCCY      | 7     | 1797  | 7.30E-161 | DREME     | db/MOUSE/uniprobe_mouse.meme                             | UP00085_1 (Sfpi1_primary) |
| 2           | MEME         | RRARRRGGGAAG | 11    | 1792  | 4.90E-157 | MEME      | db/EUKARYOTE/jolma2013.meme                              | SPIC_full                 |
| 3           | DREME        | CDCCCAC      | 7     | 970   | 3.80E-96  | DREME     | db/JASPAR/JASPAR2018_CORE Vertebrates_non-redundant.meme | MA1107.1 (KLF9)           |
| 4           | DREME        | RTGABTCA     | 8     | 516   | 1.40E-63  | DREME     | db/JASPAR/JASPAR2018_CORE Vertebrates_non-redundant.meme | MA0478.1 (FOSL2)          |
| 5           | DREME        | CTTCCY       | 6     | 1629  | 6.60E-54  | DREME     | db/JASPAR/JASPAR2018_CORE Vertebrates_non-redundant.meme | MA0149.1 (EWSR1-FLI1)     |
| 6           | MEME         | GTGGGWGG     | 8     | 661   | 1.10E-53  | MEME      | db/EUKARYOTE/jolma2013.meme                              | GLI2_DBD_1                |
| 7           | MEME         | YGCCMYCTRSTG | 12    | 488   | 9.10E-49  | MEME      | db/JASPAR/JASPAR2018_CORE Vertebrates_non-redundant.meme | MA0139.1 (CTCF)           |
| 8           | MEME         | TTTTTTTTTTTT | 12    | 187   | 6.80E-41  | MEME      | db/JASPAR/JASPAR2018_CORE Vertebrates_non-redundant.meme | MA1125.1 (ZNF384)         |
| 9           | DREME        | BCACRTG      | 7     | 627   | 2.80E-26  | DREME     |                                                          |                           |
| 10          | DREME        | GWAAY        | 5     | 3638  | 3.40E-23  | DREME     |                                                          |                           |
| 11          | DREME        | CCASTAGR     | 8     | 191   | 5.80E-22  | DREME     | db/EUKARYOTE/jolma2013.meme                              | CTCF_full                 |
| 12          | DREME        | GTCAY        | 5     | 2208  | 1.40E-13  | DREME     | db/EUKARYOTE/jolma2013.meme                              | JDP2_full_2               |
| 13          | DREME        | AGGCKG       | 6     | 885   | 1.30E-11  | DREME     |                                                          |                           |
| 14          | DREME        | AGRTGGCR     | 8     | 183   | 2.20E-11  | DREME     | db/JASPAR/JASPAR2018_CORE Vertebrates_non-redundant.meme | MA1109.1 (NEUROD1)        |
| 15          | DREME        | TATWTW       | 6     | 788   | 5.00E-11  | DREME     | db/EUKARYOTE/jolma2013.meme                              | MEF2A_DBD                 |
| 16          | MEME         | RTGACTCA     | 8     | 783   | 3.00E-10  | MEME      | db/JASPAR/JASPAR2018_CORE Vertebrates_non-redundant.meme | MA1130.1 (FOSL2::JUN)     |
| 17          | DREME        | DGAGGAAC     | 8     | 125   | 2.20E-07  | DREME     | db/JASPAR/JASPAR2018_CORE Vertebrates_non-redundant.meme | MA0081.1 (SPIB)           |
| 18          | DREME        | CCACR        | 5     | 1942  | 1.70E-06  | DREME     | db/JASPAR/JASPAR2018_CORE Vertebrates_non-redundant.meme | MA0493.1 (Klf1)           |
| 19          | DREME        | AAAAAAAA     | 8     | 177   | 8.50E-05  | DREME     | db/JASPAR/JASPAR2018_CORE Vertebrates_non-redundant.meme | MA1125.1 (ZNF384)         |
| 20          | DREME        | GCAGAAGY     | 8     | 119   | 3.20E-04  | DREME     |                                                          |                           |
| 21          | DREME        | CCASCAG      | 7     | 324   | 1.20E-03  | DREME     | db/JASPAR/JASPAR2018_CORE Vertebrates_non-redundant.meme | MA0139.1 (CTCF)           |
| 22          | DREME        | TTADGCAA     | 8     | 118   | 2.40E-03  | DREME     | db/JASPAR/JASPAR2018_CORE Vertebrates_non-redundant.meme | MA0142.1 (Pou5f1::Sox2)   |
| 23          | DREME        | CCASCTAC     | 8     | 69    | 6.70E-03  | DREME     |                                                          |                           |
| 24          | DREME        | RGRAA        | 5     | 2978  | 8.30E-03  | DREME     |                                                          |                           |
| 25          | DREME        | ASTTCTC      | 7     | 255   | 4.20E-02  | DREME     |                                                          |                           |
