# Supplementary material for: EGR1 is a gatekeeper of inflammatory enhancers in human macrophages
Source: PubMed Central journal article supplement — Sci Adv. 2021 Jan 13;7(3):eaaz8836. doi: 10.1126/sciadv.aaz8836 (PMC7806227; doi:10.1126/sciadv.aaz8836), 2021-01-13
Supplement: aaz8836_Supplementary_File_S2.pdf [file aaz8836_Supplementary_File_S2.pdf]

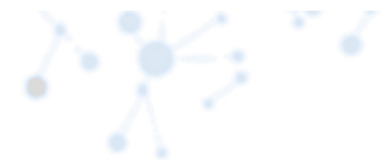

Analysis Name: IPA\_UPREGULATED\_shEGR1\_SIMULATION - 2019-05-01 02:39 PM

Analysis Creation Date: 2019-05-01

Build version: exported

Content version: 47547484 (Release Date: 2019-02-08)

### Experiment Metadata

| Name | Value |
|------|-------|
|------|-------|

### Analysis Settings

Reference set: Ingenuity Knowledge Base (Genes Only)

Relationship to include: Direct and Indirect

Does not Include Endogenous Chemicals

Optional Analyses: My Pathways My List

Filter Summary:

Consider only molecules and/or relationships where

(species = Human OR Mouse OR Rat) AND

(confidence = Experimentally Observed) AND

(tissues/cell lines = ACHN OR Heart OR Gray Matter OR Other Osteosarcoma Cell Lines OR Smooth Muscle OR Bladder OR Pro-B

lymphocytes OR Dorsal Root Ganglion OR A498 OR Kidney OR HCC-2998 OR Thymus OR Macrophages not otherwise specified OR

Teratocarcinoma Cell Lines not otherwise specified OR Other Monocytes OR Cerebellum OR Microglia OR Other Cervical cancer cell line OR

Human)

### Top Canonical Pathways

| Name                                                                  | p-value  | Overlap      |
|-----------------------------------------------------------------------|----------|--------------|
| <b>Cell Cycle Control of Chromosomal Replication</b>                  | 1.08E-07 | 17.9 % 10/56 |
| <b>Fc Receptor-mediated Phagocytosis in Macrophages and Monocytes</b> | 1.42E-05 | 10.6 % 10/94 |
| <b>Sumoylation Pathway</b>                                            | 3.17E-05 | 9.7 % 10/103 |
| <b>Role of Tissue Factor in Cancer</b>                                | 6.59E-05 | 8.1 % 11/135 |
| <b>ATM Signaling</b>                                                  | 1.12E-04 | 9.3 % 9/97   |

### Top Upstream Regulators

| Name          | p-value  | Predicted Activation |
|---------------|----------|----------------------|
| <b>TP53</b>   | 7.36E-12 |                      |
| <b>ERBB2</b>  | 7.51E-09 |                      |
| <b>E2F4</b>   | 1.39E-08 |                      |
| <b>INSIG2</b> | 2.46E-07 |                      |
| <b>RRP1B</b>  | 2.70E-07 |                      |

### Top Diseases and Bio Functions

**Diseases and Disorders**

| Name                                       | p-value range       | # Molecules |
|--------------------------------------------|---------------------|-------------|
| <b>Cancer</b>                              | 2.59E-04 - 8.09E-25 | 408         |
| <b>Endocrine System Disorders</b>          | 1.98E-04 - 8.09E-25 | 369         |
| <b>Organismal Injury and Abnormalities</b> | 2.98E-04 - 8.09E-25 | 412         |
| <b>Gastrointestinal Disease</b>            | 1.98E-04 - 1.13E-23 | 382         |
| <b>Reproductive System Disease</b>         | 2.07E-04 - 1.26E-19 | 300         |

**Molecular and Cellular Functions**

| Name                                              | p-value range       | # Molecules |
|---------------------------------------------------|---------------------|-------------|
| <b>DNA Replication, Recombination, and Repair</b> | 1.38E-04 - 3.98E-12 | 86          |
| <b>Gene Expression</b>                            | 2.25E-04 - 1.53E-11 | 129         |
| <b>Cell Death and Survival</b>                    | 2.75E-04 - 9.87E-11 | 167         |
| <b>Cellular Movement</b>                          | 2.54E-04 - 1.98E-10 | 121         |
| <b>Cellular Development</b>                       | 2.48E-04 - 3.78E-10 | 138         |

**Physiological System Development and Function**

| Name                                                 | p-value range       | # Molecules |
|------------------------------------------------------|---------------------|-------------|
| <b>Organismal Survival</b>                           | 2.67E-04 - 1.18E-10 | 134         |
| <b>Organismal Development</b>                        | 2.48E-04 - 1.88E-08 | 137         |
| <b>Embryonic Development</b>                         | 2.54E-04 - 3.29E-07 | 77          |
| <b>Hematological System Development and Function</b> | 1.49E-04 - 3.29E-07 | 104         |

**Hematopoiesis**

9.42E-05 - 3.29E-07

69

**Top Tox Functions****Assays: Clinical Chemistry and Hematology**

| Name                                       | p-value range       | # Molecules |
|--------------------------------------------|---------------------|-------------|
| <b>Decreased Levels of Albumin</b>         | 9.32E-02 - 9.32E-02 | 1           |
| <b>Increased Levels of Creatinine</b>      | 2.45E-01 - 2.40E-01 | 2           |
| <b>Increased Levels of Potassium</b>       | 2.83E-01 - 2.83E-01 | 1           |
| <b>Increased Levels of AST</b>             | 2.97E-01 - 2.97E-01 | 1           |
| <b>Increased Levels of Red Blood Cells</b> | 3.22E-01 - 3.22E-01 | 3           |

**Cardiotoxicity**

| Name                               | p-value range       | # Molecules |
|------------------------------------|---------------------|-------------|
| <b>Cardiac Enlargement</b>         | 4.22E-01 - 7.90E-06 | 32          |
| <b>Cardiac Arteriopathy</b>        | 2.69E-01 - 2.19E-03 | 11          |
| <b>Cardiac Dilation</b>            | 4.96E-01 - 2.21E-03 | 15          |
| <b>Cardiac Necrosis/Cell Death</b> | 3.24E-01 - 2.72E-03 | 12          |
| <b>Cardiac Dysfunction</b>         | 5.77E-01 - 3.01E-03 | 12          |

**Hepatotoxicity**

| Name                                        | p-value range       | # Molecules |
|---------------------------------------------|---------------------|-------------|
| <b>Liver Hyperplasia/Hyperproliferation</b> | 3.75E-01 - 3.49E-16 | 229         |
| <b>Hepatocellular carcinoma</b>             | 3.75E-01 - 6.35E-05 | 44          |
| <b>Liver Cirrhosis</b>                      | 2.25E-01 - 9.33E-04 | 13          |
| <b>Dysfunction of liver</b>                 | 2.19E-03 - 2.19E-03 | 2           |
| <b>Liver Necrosis/Cell Death</b>            | 5.06E-01 - 2.54E-03 | 10          |

### Nephrotoxicity

| Name                             | p-value range       | # Molecules |
|----------------------------------|---------------------|-------------|
| <b>Renal Enlargement</b>         | 1.83E-02 - 2.34E-04 | 7           |
| <b>Renal Necrosis/Cell Death</b> | 5.94E-01 - 2.35E-03 | 19          |
| <b>Renal Damage</b>              | 5.40E-01 - 1.63E-02 | 12          |
| <b>Glomerular Injury</b>         | 1.00E00 - 1.80E-02  | 9           |
| <b>Kidney Failure</b>            | 1.00E00 - 1.94E-02  | 10          |

### Top Regulator Effect Networks

### Top Networks

| ID | Associated Network Functions | Score |
|----|------------------------------|-------|
|----|------------------------------|-------|

|   |                                                                                |    |
|---|--------------------------------------------------------------------------------|----|
| 1 | DNA Replication, Recombination, and Repair, Cell Cycle, Developmental Disorder | 46 |
| 2 | DNA Replication, Recombination, and Repair, Cell Cycle, Cell Morphology        | 46 |
| 3 | Cellular Growth and Proliferation, Organ Development, Cell Morphology          | 39 |
| 4 | Cancer, Neurological Disease, Organismal Injury and Abnormalities              | 37 |
| 5 | Cell Morphology, Cellular Development, Cellular Movement                       | 31 |

## Top Tox Lists

| Name                                                                         | p-value  | Overlap      |
|------------------------------------------------------------------------------|----------|--------------|
| Swelling of Mitochondria                                                     | 1.60E-04 | 26.7 % 4/15  |
| Decreases Transmembrane Potential of Mitochondria and Mitochondrial Membrane | 1.99E-04 | 7.8 % 10/128 |
| Renal Necrosis/Cell Death                                                    | 2.88E-04 | 4.3 % 24/563 |
| Increases Heart Failure                                                      | 1.48E-03 | 15.4 % 4/26  |
| p53 Signaling                                                                | 1.71E-03 | 7.0 % 8/114  |

## Top My Lists

| Name                                  | p-value  | Overlap      |
|---------------------------------------|----------|--------------|
| <b>Lung Cancer</b>                    | 1.43E-04 | 4.8 % 21/438 |
| <b>Prostate Adhesion and Invasion</b> | 3.31E-01 | 3.3 % 2/61   |

### Top My Pathways

| Name                                  | p-value  | Overlap      |
|---------------------------------------|----------|--------------|
| <b>Lung Cancer</b>                    | 1.43E-04 | 4.8 % 21/438 |
| <b>RelB and immune response</b>       | 1.40E-01 | 5.9 % 2/34   |
| <b>Prostate Adhesion and Invasion</b> | 3.31E-01 | 3.3 % 2/61   |

### Top Analysis-Ready Molecules
