# Supplementary material for: EGR1 is a gatekeeper of inflammatory enhancers in human macrophages
Source: PubMed Central journal article supplement — Sci Adv. 2021 Jan 13;7(3):eaaz8836. doi: 10.1126/sciadv.aaz8836 (PMC7806227; doi:10.1126/sciadv.aaz8836), 2021-01-13
Supplement: aaz8836_Supplementary_File_S3.pdf [file aaz8836_Supplementary_File_S3.pdf]

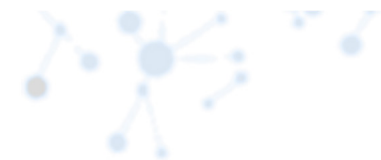

Analysis Name: FLAG\_EGR1\_LPS\_vs\_WT\_LPS\_DESeq\_fc2\_padj0.05 - 2020-03-06 02:00 PM

Analysis Creation Date: 2020-03-06

Build version: exported

Content version: 49932394 (Release Date: 2019-11-14)

### Experiment Metadata

| Name | Value |
|------|-------|
|------|-------|

### Analysis Settings

Reference set: Ingenuity Knowledge Base (Genes Only)

Relationship to include: Direct and Indirect

Includes Endogenous Chemicals

Optional Analyses: My Pathways My List

Filter Summary:

Consider only molecules and/or relationships where

(species = Human OR Uncategorized OR Rat OR Mouse) AND

(confidence = Experimentally Observed) AND

(tissues/cell lines = Vd1 Gamma-delta T cells OR HL-60 OR Langerhans cells OR Cerebral Cortex OR Immune cell lines not otherwise specified

OR Megakaryocytes OR Cerebral Ventricles OR Stem cells not otherwise specified OR Cervical cancer cell line not otherwise specified OR

Pituitary Gland OR KM-12 OR Retina OR Other Lymphocytes OR Mononuclear leukocytes not otherwise specified OR Plasmacytoid dendritic

regulator OR translation regulator OR transmembrane receptor OR transporter) AND  
 (data sources = An Open Access Database of Genome-wide Association Results OR BIND OR BioGRID OR Catalogue Of Somatic Mutations In Cancer (COSMIC) OR Chemical Carcinogenesis Research Information System (CCRIS) OR ClinicalTrials.gov OR ClinVar OR Cognition OR DIP OR DrugBank OR Gene Ontology (GO) OR GVK Biosciences OR Hazardous Substances Data Bank (HSDB) OR HumanCyc OR Ingenuity Expert Findings OR Ingenuity ExpertAssist Findings OR IntAct OR Interactome studies OR MIPS OR miRBase OR miRecords OR Mouse Genome Database (MGD) OR Obesity Gene Map Database OR Online Mendelian Inheritance in Man (OMIM) OR TarBase OR TargetScan Human)

### Top Canonical Pathways

| Name                                                                                  | p-value  | Overlap       |
|---------------------------------------------------------------------------------------|----------|---------------|
| <a href="#">Role of NFAT in Regulation of the Immune Response</a>                     | 3.14E-17 | 42.0 % 76/181 |
| <a href="#">Integrin Signaling</a>                                                    | 2.36E-16 | 39.0 % 83/213 |
| <a href="#">B Cell Receptor Signaling</a>                                             | 5.16E-16 | 40.5 % 75/185 |
| <a href="#">Systemic Lupus Erythematosus In B Cell Signaling Pathway</a>              | 4.70E-15 | 34.9 % 96/275 |
| <a href="#">Production of Nitric Oxide and Reactive Oxygen Species in Macrophages</a> | 5.23E-15 | 39.4 % 74/188 |

### Top Upstream Regulators

#### Upstream Regulators

| Name | p-value | Predicted Activation |
|------|---------|----------------------|
|------|---------|----------------------|

|                    |          |           |
|--------------------|----------|-----------|
| lipopolysaccharide | 1.12E-53 | Inhibited |
| IFNG               | 4.52E-50 | Inhibited |
| Interferon alpha   | 1.00E-44 | Inhibited |
| TNF                | 8.10E-38 | Inhibited |
| dexamethasone      | 2.02E-34 |           |

### Causal Network

| Name                                             | p-value  | Predicted Activation |
|--------------------------------------------------|----------|----------------------|
| IFNG                                             | 2.70E-53 | Inhibited            |
| lipopolysaccharide                               | 6.18E-50 | Inhibited            |
| 6-aminopyrazolopyrimidine derivative compound II | 3.35E-47 | Activated            |
| 5'-adenylyl (beta,gamma-methylene)diphosphonate  | 9.59E-43 | Activated            |
| TBK1                                             | 8.35E-42 | Inhibited            |

### Top Diseases and Bio Functions

#### Diseases and Disorders

| Name                                | p-value range        | # Molecules |
|-------------------------------------|----------------------|-------------|
| Cancer                              | 5.83E-16 - 2.49E-135 | 3392        |
| Organismal Injury and Abnormalities | 5.83E-16 - 2.49E-135 | 3443        |
| Inflammatory Response               | 6.30E-16 - 2.66E-87  | 1277        |
| Endocrine System Disorders          | 1.23E-16 - 2.19E-84  | 2657        |

**Gastrointestinal Disease**

3.23E-16 - 1.84E-72

2968

**Molecular and Cellular Functions**

| Name                                     | p-value range       | # Molecules |
|------------------------------------------|---------------------|-------------|
| <b>Cellular Compromise</b>               | 6.80E-16 - 9.20E-86 | 414         |
| <b>Cellular Function and Maintenance</b> | 4.24E-16 - 5.70E-71 | 1229        |
| <b>Cell Death and Survival</b>           | 6.80E-16 - 1.17E-62 | 1318        |
| <b>Cellular Movement</b>                 | 6.30E-16 - 1.40E-61 | 1016        |
| <b>Cellular Development</b>              | 4.96E-16 - 8.51E-55 | 1185        |

**Physiological System Development and Function**

| Name                                                 | p-value range       | # Molecules |
|------------------------------------------------------|---------------------|-------------|
| <b>Hematological System Development and Function</b> | 6.30E-16 - 1.05E-56 | 1042        |
| <b>Tissue Morphology</b>                             | 6.10E-16 - 1.05E-56 | 755         |
| <b>Immune Cell Trafficking</b>                       | 6.30E-16 - 3.04E-55 | 628         |
| <b>Lymphoid Tissue Structure and Development</b>     | 6.10E-16 - 9.29E-55 | 729         |
| <b>Organismal Survival</b>                           | 7.57E-34 - 1.21E-54 | 1035        |

**Top Tox Functions****Assays: Clinical Chemistry and Hematology**

| Name                                            | p-value range       | # Molecules |
|-------------------------------------------------|---------------------|-------------|
| <b>Increased Levels of ALT</b>                  | 2.43E-01 - 1.86E-06 | 18          |
| <b>Increased Levels of Red Blood Cells</b>      | 4.98E-01 - 1.40E-05 | 35          |
| <b>Increased Levels of Hematocrit</b>           | 7.12E-05 - 7.12E-05 | 31          |
| <b>Increased Levels of Albumin</b>              | 6.44E-01 - 9.93E-04 | 10          |
| <b>Increased Levels of Alkaline Phosphatase</b> | 1.58E-01 - 1.27E-03 | 23          |

### Cardiotoxicity

| Name                               | p-value range       | # Molecules |
|------------------------------------|---------------------|-------------|
| <b>Cardiac Necrosis/Cell Death</b> | 3.69E-01 - 2.28E-14 | 99          |
| <b>Cardiac Fibrosis</b>            | 4.29E-01 - 4.98E-08 | 75          |
| <b>Cardiac Enlargement</b>         | 1.00E00 - 1.17E-07  | 189         |
| <b>Cardiac Infarction</b>          | 5.59E-01 - 6.34E-06 | 81          |
| <b>Congenital Heart Anomaly</b>    | 1.00E00 - 8.23E-05  | 86          |

### Hepatotoxicity

| Name                                        | p-value range       | # Molecules |
|---------------------------------------------|---------------------|-------------|
| <b>Liver Damage</b>                         | 5.77E-01 - 9.19E-18 | 97          |
| <b>Liver Necrosis/Cell Death</b>            | 4.03E-01 - 1.74E-15 | 108         |
| <b>Liver Inflammation/Hepatitis</b>         | 4.98E-01 - 7.04E-15 | 141         |
| <b>Liver Hyperplasia/Hyperproliferation</b> | 5.88E-01 - 7.78E-14 | 1403        |
| <b>Liver Steatosis</b>                      | 4.42E-01 - 2.82E-11 | 121         |

**Nephrotoxicity**

| Name                             | p-value range       | # Molecules |
|----------------------------------|---------------------|-------------|
| <b>Renal Necrosis/Cell Death</b> | 5.77E-01 - 1.35E-19 | 181         |
| <b>Renal Damage</b>              | 5.39E-01 - 1.37E-10 | 103         |
| <b>Glomerular Injury</b>         | 5.88E-01 - 1.39E-10 | 173         |
| <b>Renal Inflammation</b>        | 6.44E-01 - 1.39E-10 | 132         |
| <b>Renal Nephritis</b>           | 6.44E-01 - 1.39E-10 | 132         |

**Top Regulator Effect Networks**

| ID | Regulators                    | Disease & Functions               | Consistency Score |
|----|-------------------------------|-----------------------------------|-------------------|
| 1  | lfnar                         | Immune response of cells          | 5.029             |
| 2  | curcumin                      | Colony formation                  | 4.526             |
| 3  | curcumin                      | Colony formation of cells         | 4.311             |
| 4  | F2R                           | Cell movement of tumor cell lines | 4.249             |
| 5  | E. coli B5 lipopolysaccharide | Interaction of lymphocytes        | 4.146             |

**Top Networks**

| ID | Associated Network Functions | Score |
|----|------------------------------|-------|
|----|------------------------------|-------|

|   |                                                                                                                 |    |
|---|-----------------------------------------------------------------------------------------------------------------|----|
| 1 | Psychological Disorders, Hereditary Disorder, Organismal Injury and Abnormalities                               | 33 |
| 2 | Cellular Assembly and Organization, DNA Replication, Recombination, and Repair, Post-Translational Modification | 33 |
| 3 | Organ Morphology, Tissue Morphology, Visual System Development and Function                                     | 30 |
| 4 | Inflammatory Response, Cell Morphology, Connective Tissue Development and Function                              | 30 |
| 5 | Post-Translational Modification, Developmental Disorder, Hereditary Disorder                                    | 30 |

## Top Tox Lists

| Name                               | p-value  | Overlap        |
|------------------------------------|----------|----------------|
| <b>Renal Necrosis/Cell Death</b>   | 3.04E-21 | 31.4 % 181/577 |
| <b>Liver Necrosis/Cell Death</b>   | 2.22E-15 | 33.5 % 108/322 |
| <b>Cardiac Necrosis/Cell Death</b> | 2.55E-13 | 32.6 % 99/304  |

|                               |          |              |
|-------------------------------|----------|--------------|
| <b>Increases Liver Damage</b> | 1.55E-12 | 46.8 % 44/94 |
| <b>Increases Renal Damage</b> | 2.96E-09 | 41.8 % 38/91 |

### Top My Lists

| Name                                  | p-value  | Overlap        |
|---------------------------------------|----------|----------------|
| <b>Lung Cancer</b>                    | 2.60E-13 | 29.5 % 129/437 |
| <b>Prostate Adhesion and Invasion</b> | 7.83E-04 | 32.8 % 20/61   |

### Top My Pathways

| Name                                  | p-value  | Overlap        |
|---------------------------------------|----------|----------------|
| <b>Lung Cancer</b>                    | 2.60E-13 | 29.5 % 129/437 |
| <b>Prostate Adhesion and Invasion</b> | 7.83E-04 | 32.8 % 20/61   |
| <b>RelB and immune response</b>       | 7.72E-02 | 26.5 % 9/34    |

### Top Analysis-Ready Molecules

#### Expr Log Ratio

| Molecules      | Expr. Value | Chart |
|----------------|-------------|-------|
| <b>TKTL1</b>   | ↑ 2.062     |       |
| <b>CYP1D1P</b> | ↑ 1.926     |       |



|                     |         |
|---------------------|---------|
| <b>EGR1</b>         | ↑ 1.676 |
| <b>ROR1-AS1</b>     | ↑ 1.668 |
| <b>HS3ST2</b>       | ↑ 1.488 |
| <b>LURAP1L-AS1</b>  | ↑ 1.404 |
| <b>RP11-2H3.7</b>   | ↑ 1.371 |
| <b>RP11_315E171</b> | ↑ 1.316 |
| <b>KLF5</b>         | ↑ 1.242 |
| <b>ATP6V0D2</b>     | ↑ 1.141 |

### Expr Log Ratio

| Molecules     | Expr. Value | Chart |
|---------------|-------------|-------|
| <b>FTH1P2</b> | ↓ -5.282    |       |
| <b>HLA-C</b>  | ↓ -3.871    |       |
| <b>TACC3</b>  | ↓ -3.341    |       |
| <b>P2RY13</b> | ↓ -2.920    |       |
| <b>FCGR2C</b> | ↓ -2.904    |       |
| <b>FCGR2B</b> | ↓ -2.898    |       |
| <b>CH25H</b>  | ↓ -2.880    |       |
| <b>S100A8</b> | ↓ -2.864    |       |
| <b>CD14</b>   | ↓ -2.857    |       |
| <b>HSPA7</b>  | ↓ -2.844    |       |
